# Supplementary material for: Efficient ZrO(NO3)2.2H2O Catalyzed Synthesis of 1H-Indazolo[1,2-b] phthalazine-1,6,11(13H)-triones and Electronic Properties Analyses, Vibrational Frequencies, NMR Chemical Shift Analysis, MEP: A DFT Study
Source: Hindawi journal article supplement (doi:10.1155/2020/9483520), 2020-03-01

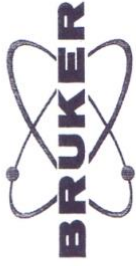

Current Data Parameters  
NAME Dr Shajari  
EXPNO 87  
PROCNO 1

F2 - Acquisition Parameters

Date 20170701  
Time 8.11  
INSTRUM spect  
PROBHD 5 mm Multinucl  
PULPROG zg  
TD 16384  
SOLVENT DMSO  
NS 20  
DS 0  
SWH 4990.020 Hz  
FIDRES 0.304567 Hz  
AQ 1.6417269 sec  
RG 32  
DW 100.200 usec  
DE 6.00 usec  
TE 300.0 K  
D1 2.00000000 sec

==== CHANNEL f1 =====  
NUC1 1H  
P1 9.00 usec  
PL1 3.00 dB  
SFO1 250.1317509 MHz

F2 - Processing parameters  
SI 32768  
SF 250.1300000 MHz  
WDW EM  
SSB 0  
LB 1.00 Hz  
GB 0  
PC 1.00

0.961  
1.000  
2.069  
2.234  
2.326  
2.476  
2.593  
3.361  
3.646  
3.799  
5.255  
7.007  
7.040  
7.672  
7.714  
7.768  
7.801  
8.496  
8.601  
8.798  
8.822

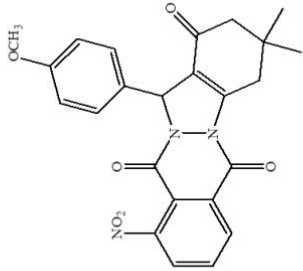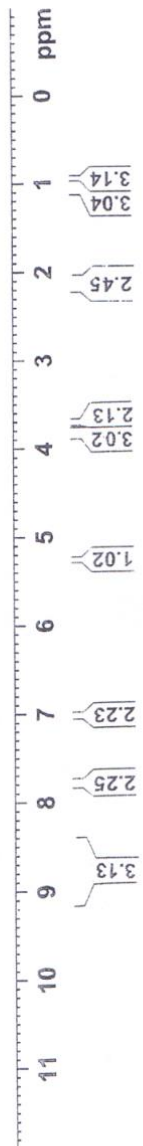

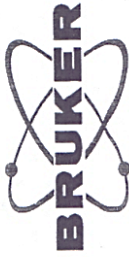

Current Data Parameters  
 NAME Dr Shajari  
 EXPNO 90  
 PROCNO 1

F2 - Acquisition Parameters  
 Date\_ 20170704  
 Time\_ 4.08  
 INSTRUM spect  
 PROBHD 5 mm Multinucl  
 PULPROG zgpg  
 TD 65536  
 SOLVENT DMSO  
 NS 11000  
 DS 0  
 SWH 15060.241 Hz  
 FIDRES 0.229801 Hz  
 AQ 2.1758451 sec  
 RG 1625.5  
 DW 33.200 usec  
 DE 6.00 usec  
 TE 300.0 K  
 D1 2.00000000 sec  
 d11 0.03000000 sec  
 d12 0.00002000 sec

===== CHANNEL f1 =====  
 NUC1 13C  
 P1 10.00 usec  
 PL1 0.00 dB  
 SF01 62.9015280 MHz

===== CHANNEL f2 =====  
 CPDPRG2 waltz16  
 NUC2 1H  
 PCPD2 80.00 usec  
 PL2 3.00 dB  
 PL12 21.50 dB  
 PL13 23.00 dB  
 SFO2 250.1310005 MHz

F2 - Processing Parameters  
 SI 32768  
 SF 62.8952390 MHz  
 WDW EM  
 SSB 0  
 LB 3.00 Hz  
 GB 0  
 FC 1.40

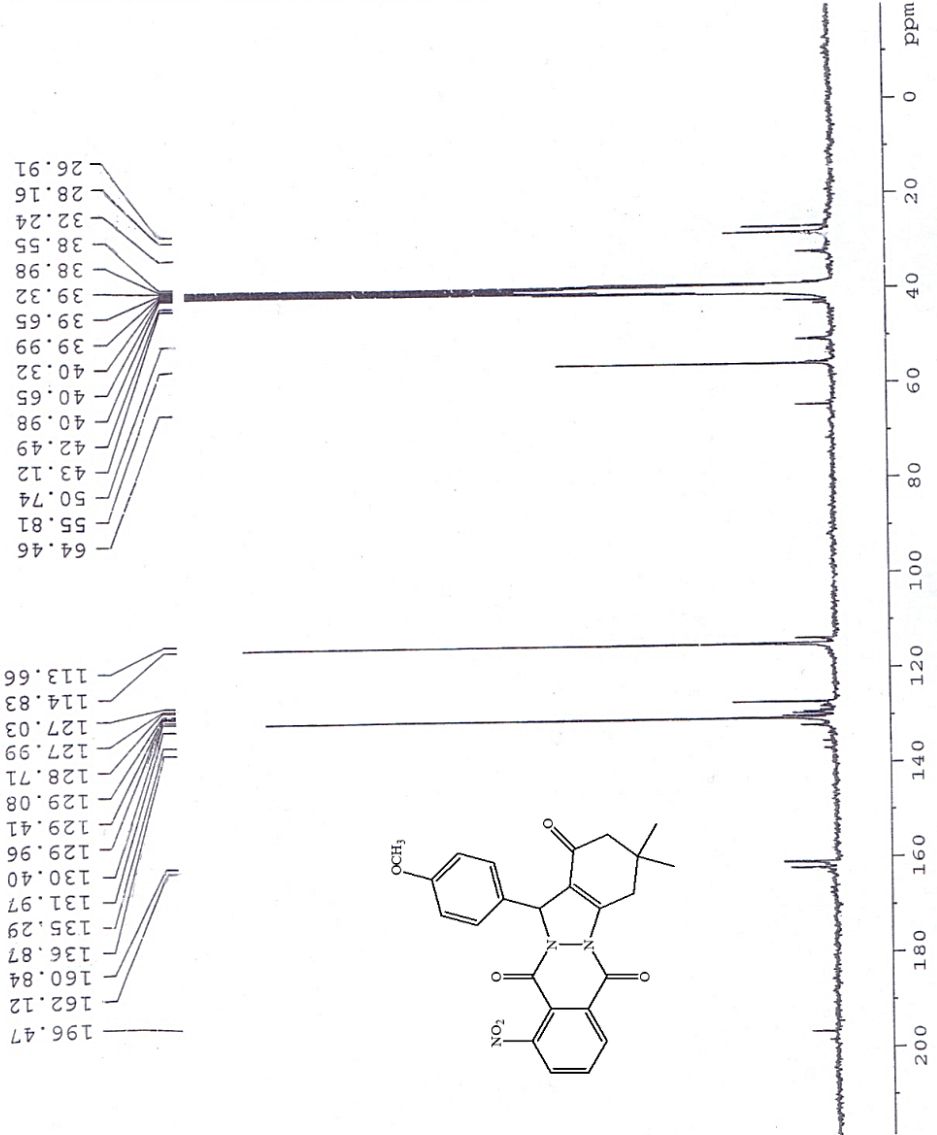

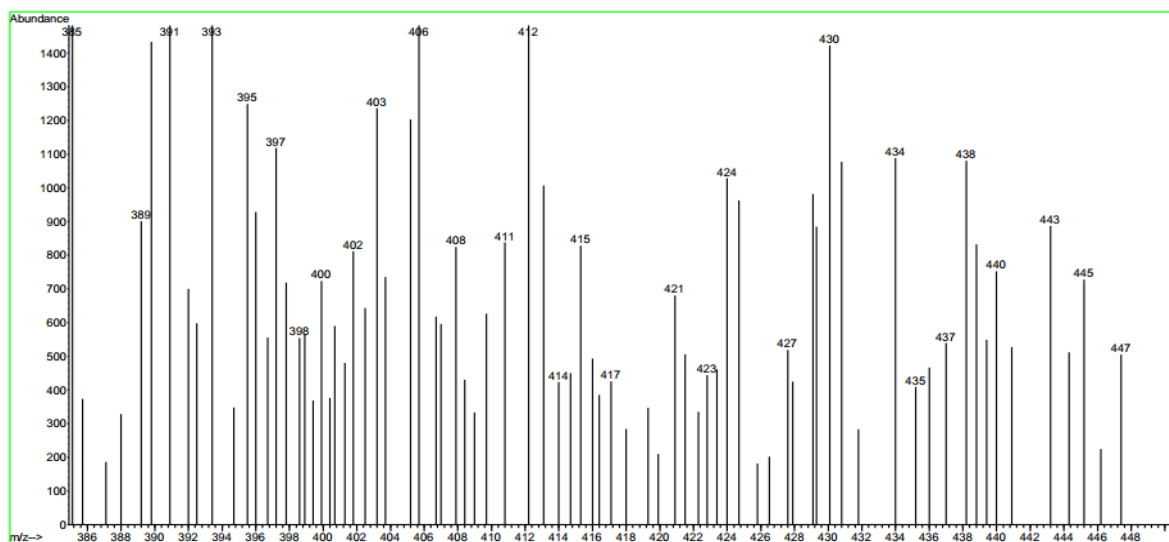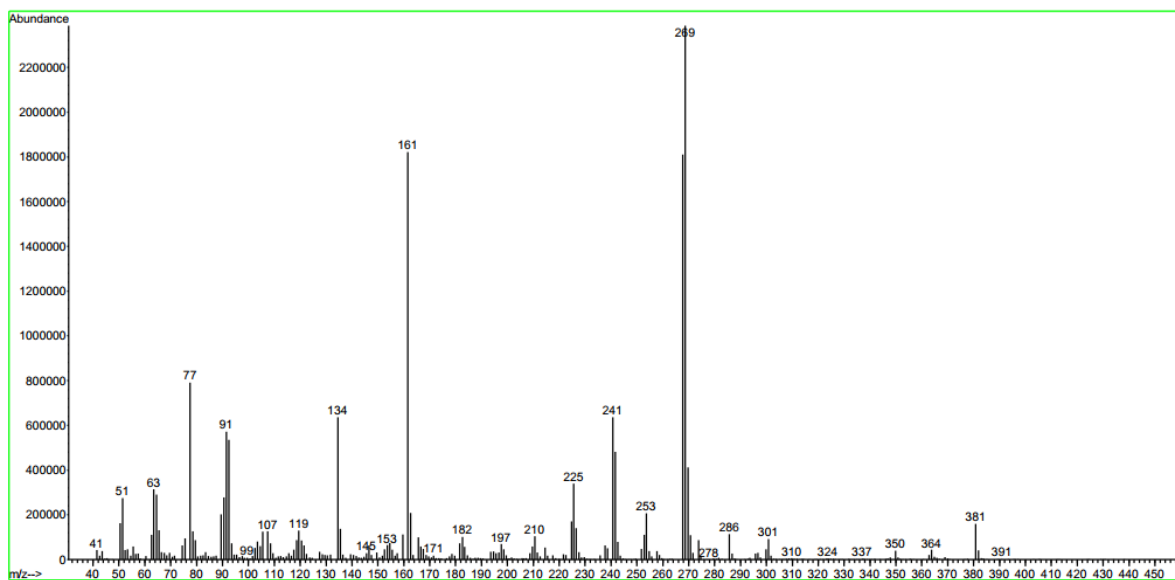

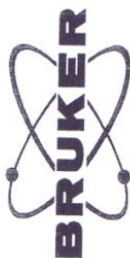

Current Data Parameters  
NAME Dr Shajari  
EXPNO 81  
PROCNO 1

F2 - Acquisition Parameters

Date\_ 20170531  
Time 9.34  
INSTRUM spect  
PROBHD 5 mm Multinucl  
PULPROG zg  
TD 16384  
SOLVENT DMSO  
NS 20  
DS 0  
SWH 4990.020 Hz  
FIDRES 0.304567 Hz  
AQ 1.6417269 sec  
RG 32  
DW 100.200 usec  
DE 6.00 usec  
TE 300.0 K  
D1 2.0000000 sec

==== CHANNEL f1 =====  
NUC1 1H  
P1 9.00 usec  
PL1 3.00 dB  
SFO1 250.1317509 MHz

F2 - Processing parameters

SI 32768  
SF 250.1300000 MHz  
WDW EM  
SSB 0  
LB 1.00 Hz  
GB 0  
PC 1.00

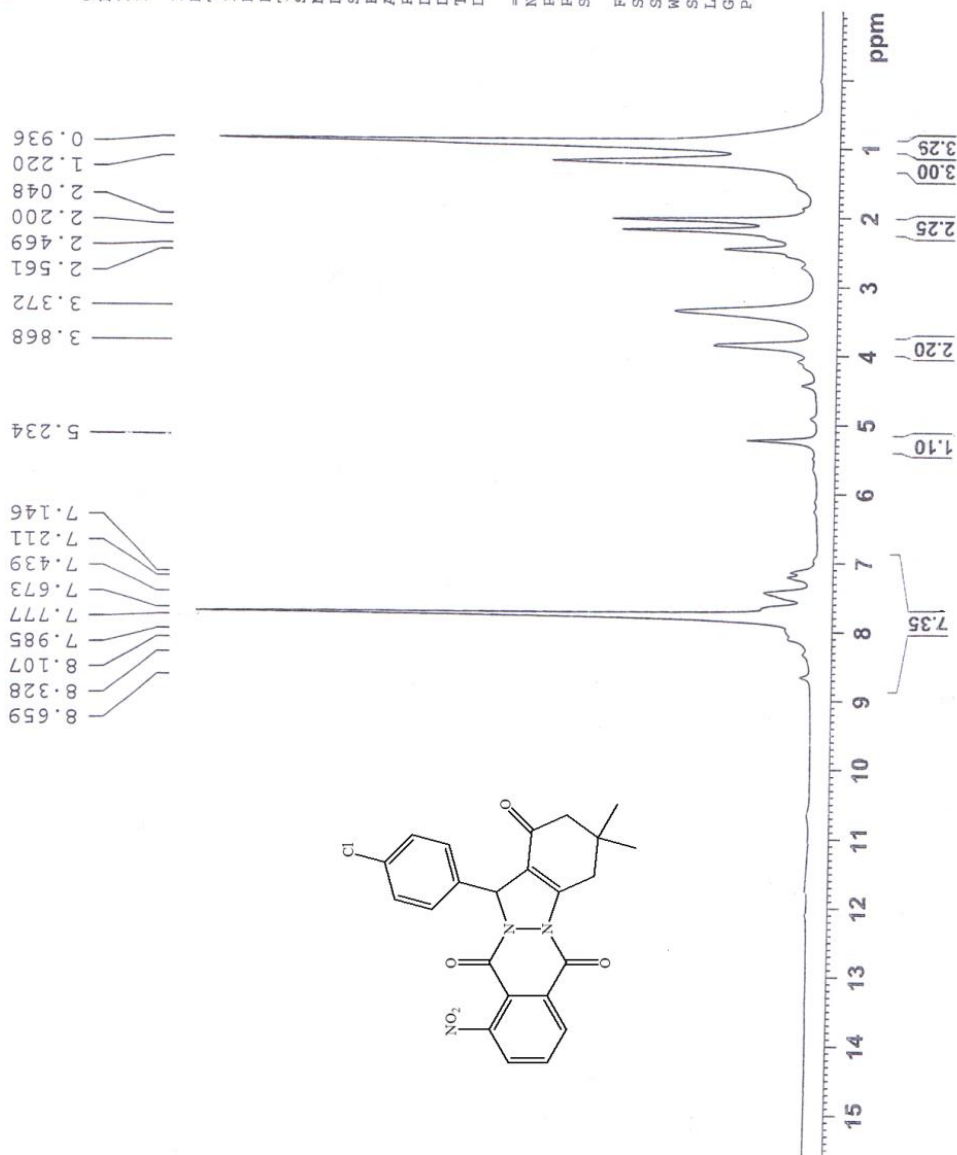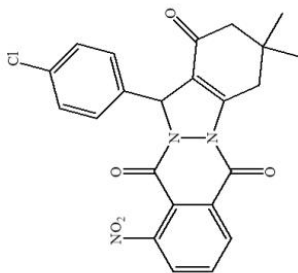

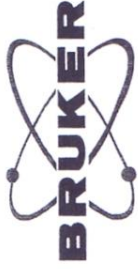

Current Data Parameters  
 NAME Dr Shajari  
 EXPNO 82  
 PROCNO 1

F2 - Acquisition Parameters

Date\_ 20170606  
 Time 0.10  
 INSTRUM spect  
 PROBHD 5 mm Multinucl  
 PULPROG zgpg3  
 TD 65536  
 SOLVENT DMSO  
 NS 11000  
 DS 0  
 SWH 15060.241 Hz  
 FIDRES 0.229801 Hz  
 AQ 2.1758451 sec  
 RG 1625.5  
 DW 33.200 usec  
 DE 6.00 usec  
 TE 300.0 K  
 D1 2.00000000 sec  
 d11 0.03000000 sec  
 d12 0.00002000 sec

==== CHANNEL f1 =====  
 NUC1 13C  
 P1 10.00 usec  
 PL1 0.00 dB  
 SFO1 62.9015280 MHz

==== CHANNEL f2 =====  
 CPDPRG2 waltz16  
 NUC2 1H  
 PCPD2 80.00 usec  
 PL2 3.00 dB  
 PL12 21.50 dB  
 PL13 23.00 dB  
 SFO2 250.1310005 MHz

F2 - Processing parameters  
 SI 32768  
 SF 62.8952390 MHz  
 WDW EM  
 SSB 0  
 LB 3.00 Hz  
 GB 0  
 PC 1.40

26.82  
 28.12  
 32.45  
 38.51  
 38.90  
 39.23  
 39.56  
 39.90  
 39.90  
 40.23  
 40.23  
 40.56  
 40.89  
 42.43  
 50.68  
 64.45  
 114.38  
 123.32  
 128.22  
 128.67  
 128.90  
 129.07  
 129.26  
 129.46  
 129.89  
 130.34  
 133.01  
 133.01  
 134.70  
 161.00  
 163.41  
 196.43

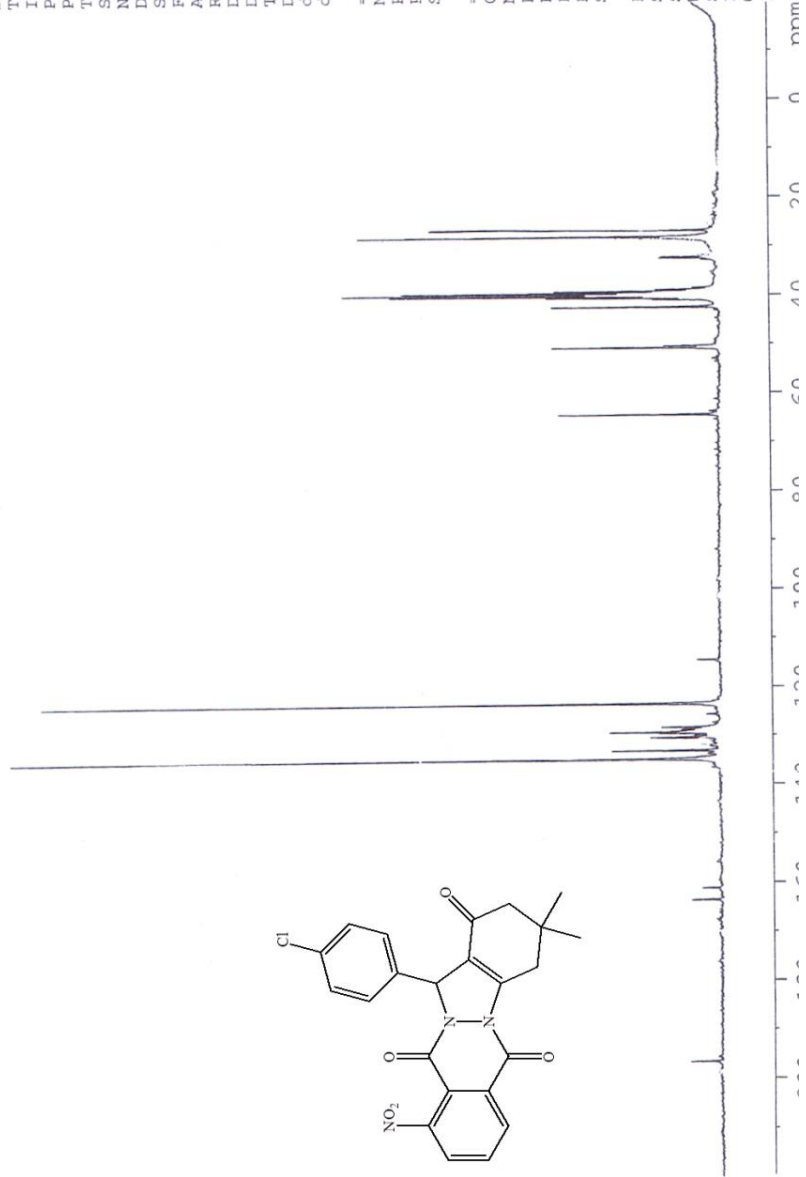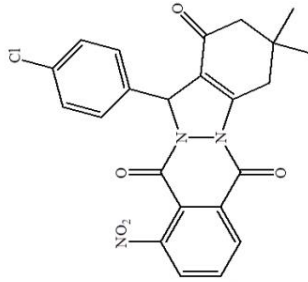

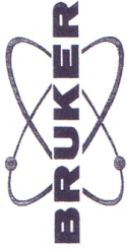

Current Data Parameters  
NAME Dr Shajari  
EXPNO 83  
PROCNO 1

F2 - Acquisition Parameters

Date\_ 20170625  
Time 7.24  
INSTRUM spect  
PROBHD 5 mm Multinucl  
PULPROG zg  
TD 16384  
SOLVENT DMSO  
NS 20  
DS 0  
SWH 4990.020 Hz  
FIDRES 0.304567 Hz  
AQ 1.6417269 sec  
RG 32  
DW 100.200 usec  
DE 6.00 usec  
TE 300.0 K  
D1 2.00000000 sec

==== CHANNEL f1 =====  
NUC1 1H  
PI 9.00 usec  
PL1 3.00 dB  
SFO1 250.1317509 MHz

F2 - Processing parameters  
SI 32768  
SF 250.1300000 MHz  
WDW EM  
SSB 0  
LB 1.00 Hz  
GB 0  
PC 1.00

7.364  
7.419  
7.492  
7.664  
7.780  
7.863  
8.345  
8.361  
8.694  
5.261  
3.921  
3.896  
3.871  
3.330  
2.478  
2.234  
2.172  
2.144  
2.073  
1.244  
0.964

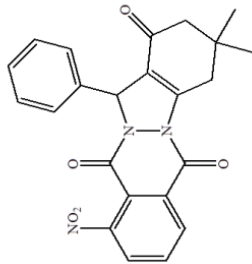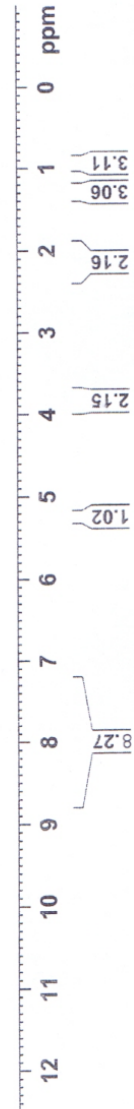

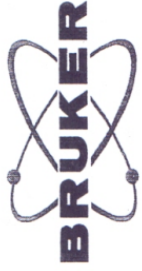

Current Data Parameters  
NAME Dr Shajari  
EXPNO 84  
PROCNO 1

F2 - Acquisition Parameters

Date\_ 20170625  
Time\_ 4.02  
INSTRUM spect  
PROBHD 5 mm Multinucl  
PULPROG zgpg  
TD 65536  
SOLVENT DMSO  
NS 11000  
DS 0  
SWH 15060.241 Hz  
FIDRES 0.229801 Hz  
AQ 2.1758451 sec  
RG 1625.5  
DM 33.200 usec  
DE 6.00 usec  
TE 300.0 K  
D1 2.00000000 sec  
d11 0.03000000 sec  
d12 0.00002000 sec

==== CHANNEL f1 =====  
NUC1 13C  
P1 10.00 usec  
PL1 0.00 dB  
SFO1 62.9015280 MHz

==== CHANNEL f2 =====  
CPDPRG2 waltz16  
NUC2 1H  
PCPD2 80.00 usec  
PL2 3.00 dB  
PL12 21.50 dB  
PL13 23.00 dB  
SFO2 250.1310005 MHz

F2 - Processing parameters  
SI 32768  
SF 62.8952390 MHz  
WDW EM  
SSB 0  
LB 3.00 Hz  
GB 0  
PC 1.40

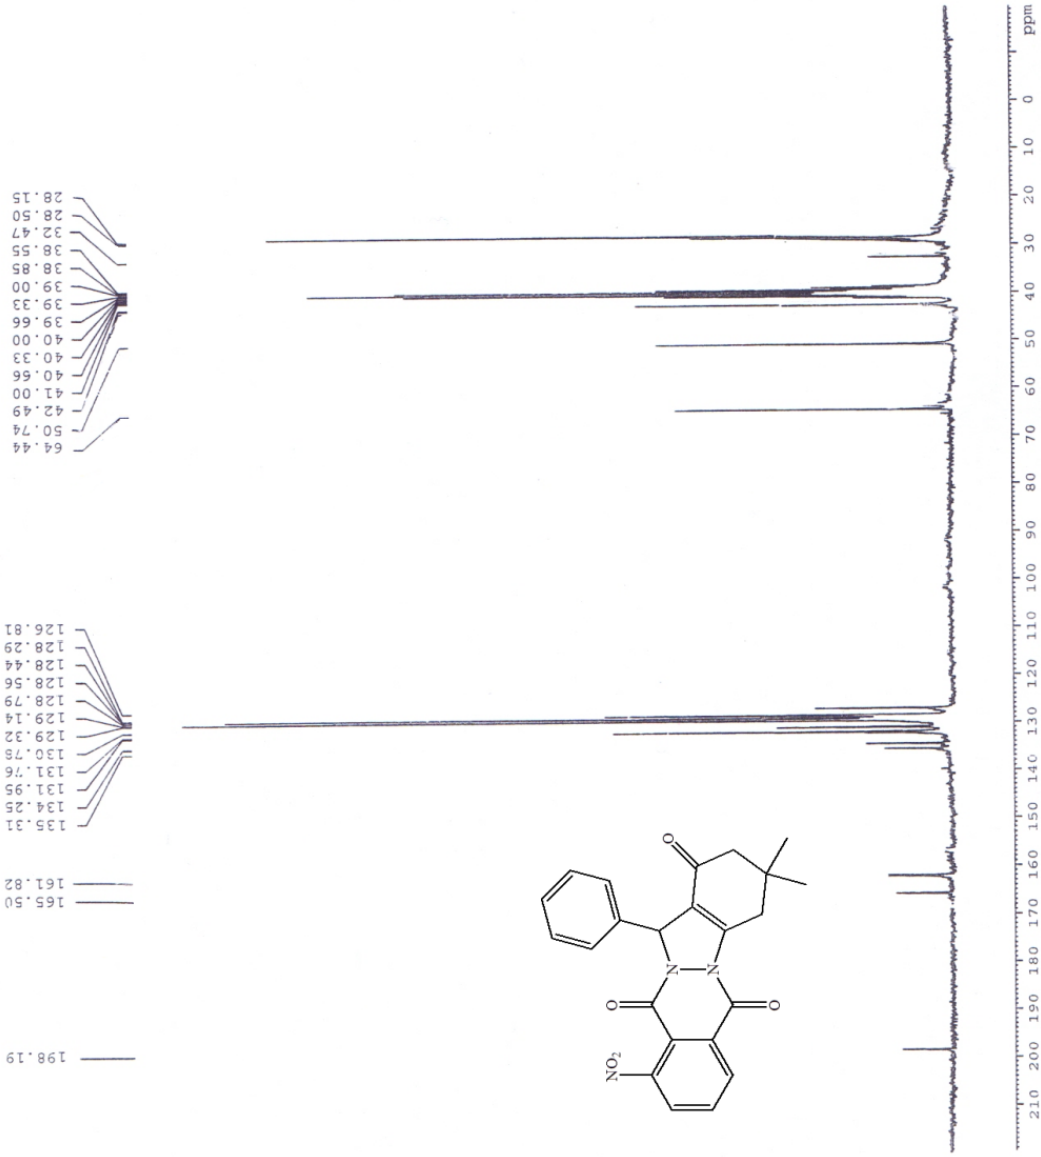

Supplement: f1 [file 9483520.f1.pdf]
